# Supplementary material
Source: publisher figshare collection journal article supplement (https://frontiersin.figshare.com/ndownloader/files/12784469)

**Supplemental Figure 5.** Gene ontology (GO) categories significantly enriched between orange and black epidermal tissues of adult *Amphiprion percula* for ‘biological process’ using Mann-Whitney U tests based on ranking of signed log *p*-values computed using *EdgeR*. Results are plotted as dendrograms tracing the level of gene sharing between significant categories. Direction of change is noted in color where those GO categories overrepresented in orange tissue are colored as orange and those overrepresented in black tissue are colored as black and gray.

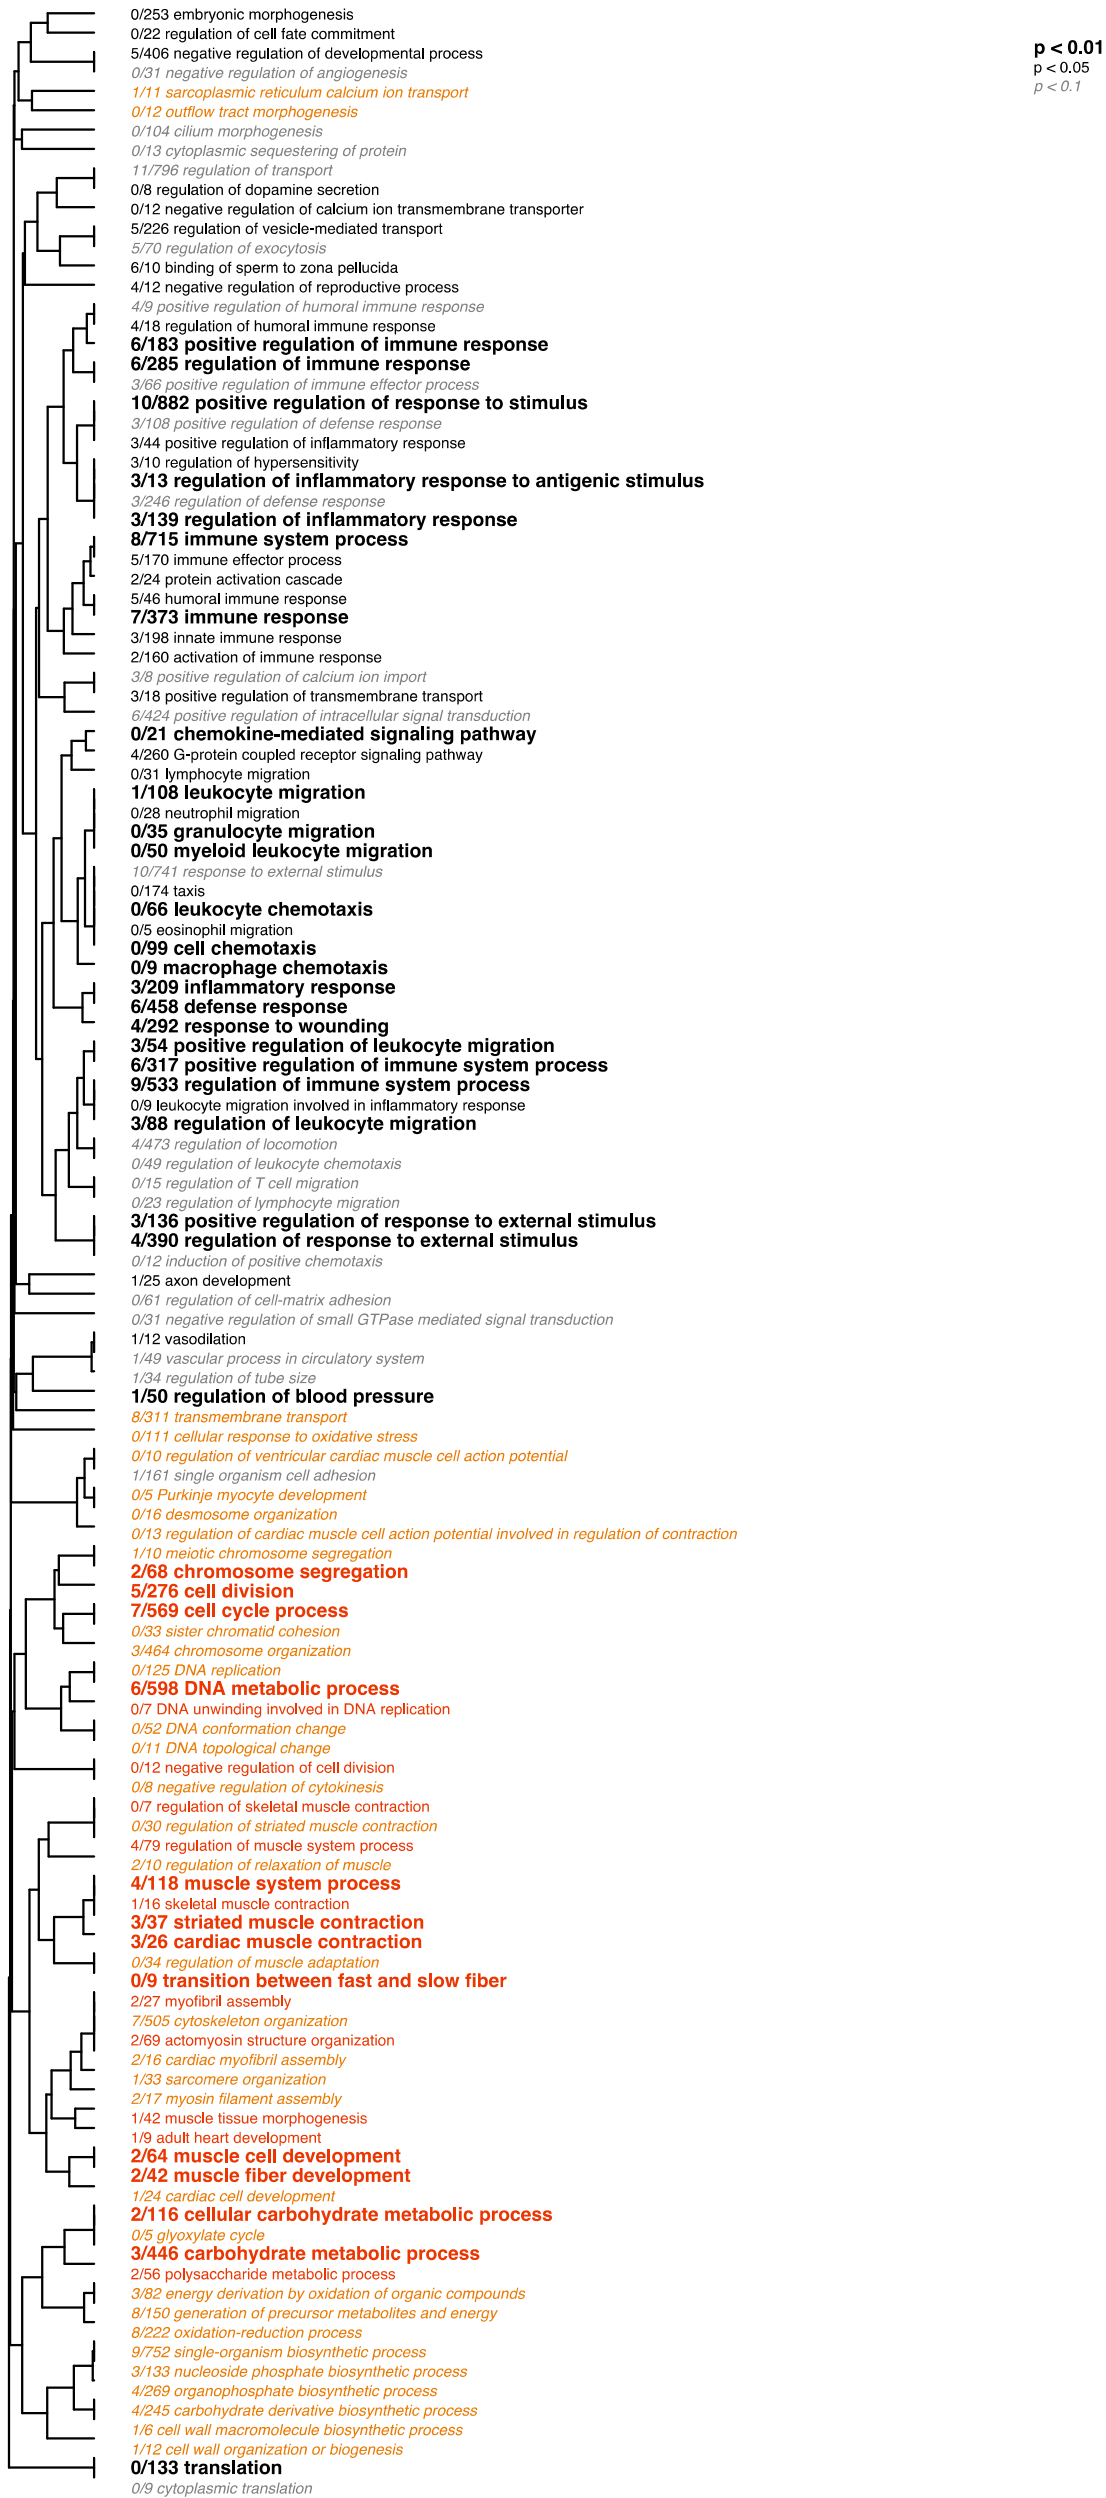

Supplement: Supplementary file 1 [file 12784469]
